# Supplementary material for: Synergistic effects of the Rh–S bond and spatially separated dual cocatalysts on photocatalytic overall water splitting activity of ZnIn2S4 nanosheets under visible light irradiation
Source: Royal Society of Chemistry journal article supplement (doi:10.1039/d3dt00050h), 2023-01-01
Supplement: d3dt00050h1.pdf [file d3dt00050h1.pdf]

## Synergistic effects of Rh-S bond and spatially separated dual cocatalysts on photocatalytic overall water splitting activity of ZnIn<sub>2</sub>S<sub>4</sub> nanosheets under visible light irradiation

Haitong Jing,<sup>‡abd</sup> Huili Li,<sup>‡c</sup> Jianyong Yue,<sup>abd</sup> Shiyang Fan,<sup>b</sup> Bo Yao,<sup>b</sup> Shiyang Liu,<sup>b</sup> Zebo Fang,<sup>\*b</sup>  
Rong Wu,<sup>\*ad</sup> Linyu Yang,<sup>\*ad</sup> and Shunhang Wei<sup>\*b</sup>

<sup>a</sup> School of Physics Science and Technology, Xinjiang University, Urumqi, Xinjiang 830000, China. E-mail: yanglinyu0222@sina.com (L. Yang); wurongxju@sina.com (R. Wu)

<sup>b</sup> Zhejiang Engineering Research Center of MEMS, Shaoxing University, Shaoxing 312000, China. E-mail: csfzb@usx.edu.cn, wshusx@163.com

<sup>c</sup> College of Chemistry and Materials Science, Shanghai Normal University, Shanghai 200234, China.

<sup>d</sup> Xinjiang Key Laboratory of Solid State Physics and Devices, Xinjiang University, Urumqi, Xinjiang 830017, China

<sup>‡</sup> Equal contributions.

### Chemicals

Zinc acetate dihydrate (Aladdin; AR), Indium(III) chloride tetrahydrate (Macklin; AR), Thioacetamide (Macklin; AR), Citric acid (Aladdin; AR), Chromium(III) nitrate nonahydrate (Aladdin; AR), Rhodium Chloride Hydrate (Aladdin; AR), Ethanol absolute (SCR; AR), Chloroplatinic acid hexahydrate (Aladdin; AR).

### Preparation of ZnIn<sub>2</sub>S<sub>4</sub> loaded with different cocatalysts

The hydrothermal preparation of initial ZnIn<sub>2</sub>S<sub>4</sub> was obtained according to our reported literature <sup>1</sup>.

ZnIn<sub>2</sub>S<sub>4</sub>-Pt-Cr and ZnIn<sub>2</sub>S<sub>4</sub>-Rh-Cr were prepared by loading the cocatalyst onto the initial ZnIn<sub>2</sub>S<sub>4</sub> by photodeposition method. In general, 100 mL of pure water is mixed with H<sub>2</sub>PtCl<sub>6</sub> (1.5wt % Pt) or RhCl<sub>3</sub> (1.5wt % Rh), Cr(NO<sub>3</sub>)<sub>3</sub> (0.5wt % Cr) and photocatalyst (50 mg). Then the suspension was stirred for two hours under vacuum and irradiation with a 300W xenon lamp.

ZnIn<sub>2</sub>S<sub>4</sub>-Pt, ZnIn<sub>2</sub>S<sub>4</sub>-Rh and ZnIn<sub>2</sub>S<sub>4</sub>-Cr were prepared using the above method but only use H<sub>2</sub>PtCl<sub>6</sub> (1.5wt % Pt), RhCl<sub>3</sub> (1.5wt % Rh) or Cr(NO<sub>3</sub>)<sub>3</sub> (0.5wt % Cr).

### Characterization

The morphologies of the samples were recorded using a high-resolution transmission electron microscope (HRTEM, JEM-2100F) equipped with energy dispersive X-ray spectrometer (EDS). The elemental chemical states of the samples were measured using a X-ray photoelectron spectroscopy (XPS, Thermo Scientific K-

Alpha+), and the binding energies calibrated to the C1s peak at 284.8 eV. The photoluminescence (PL) spectra were measured at room temperature using a fluorescence spectrophotometer (Hitachi F-7000) (excitation wave length: 360 nm). The time-resolved PL (TRPL) decay spectra were recorded using a spectrofluorometer (FLUOROLOG-3-11) with an excitation wavelength of 370 nm.

### Photocatalytic overall water splitting activity measurements

Photocatalytic overall water splitting perform were tested on Labsolar-IIIAG system (Perfect Light).  $ZnIn_2S_4$  (50 mg) loaded with cocatalyst was added into 100 mL of pure water. A vacuum was applied to remove any dissolved gases before photocatalytic water splitting activity. A 300 W Xenon lamp (Perfect Light, PLX-SXE300) equipped with UV cutoff filter ( $\lambda \geq 420$  nm) was used as visible light source.

$$\text{Apparent quantum efficiency (AQE)} = \frac{2 \times \text{moles of } H_2 \text{ production per hour}}{\text{moles of photon flux per hour}} \times 100\% \quad (1)$$

A 300 W Xenon lamp with AM 1.5G filter ( $100 \text{ mW cm}^{-2}$ ) and 100 mg photocatalyst are used to achieve STH efficiency.

$$\text{STH} = \frac{H_2 \text{ production rate (mol s}^{-1}) \times 237 \text{KJ mol}^{-1}}{\text{energy flux of the incident sunlight (W m}^{-2}) \times \text{irradiated area (m}^2)} \times 100\% \quad (2)$$

### Photoelectrochemical measurement

In a three-electrode system, photoelectrochemical properties were tested using an electrochemical workstation (CHI-760E). An electrophoretic deposition method was used to prepare the working electrode <sup>1,2</sup>. The electrophoresis was conducted for five minutes at a constant bias of 10 V. After preparation, the electrode was dried at 100°C in air for one hour. The counter electrode was a platinum foil (10 x 10 mm). The reference electrode was a Hg/HgO electrode. KOH solution (0.1 M, pH = 13) was used as electrolyte.

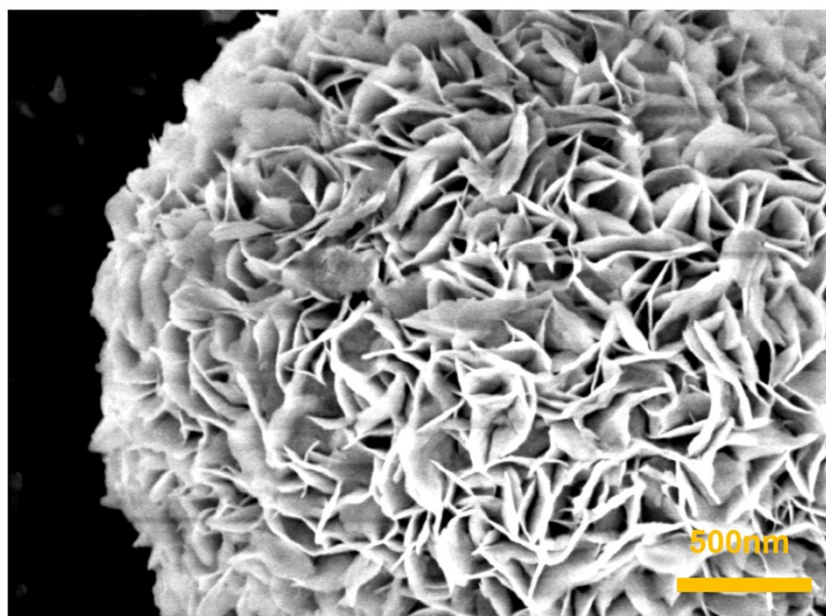

Fig. S1. FESEM image of the  $\text{ZnIn}_2\text{S}_4$ .

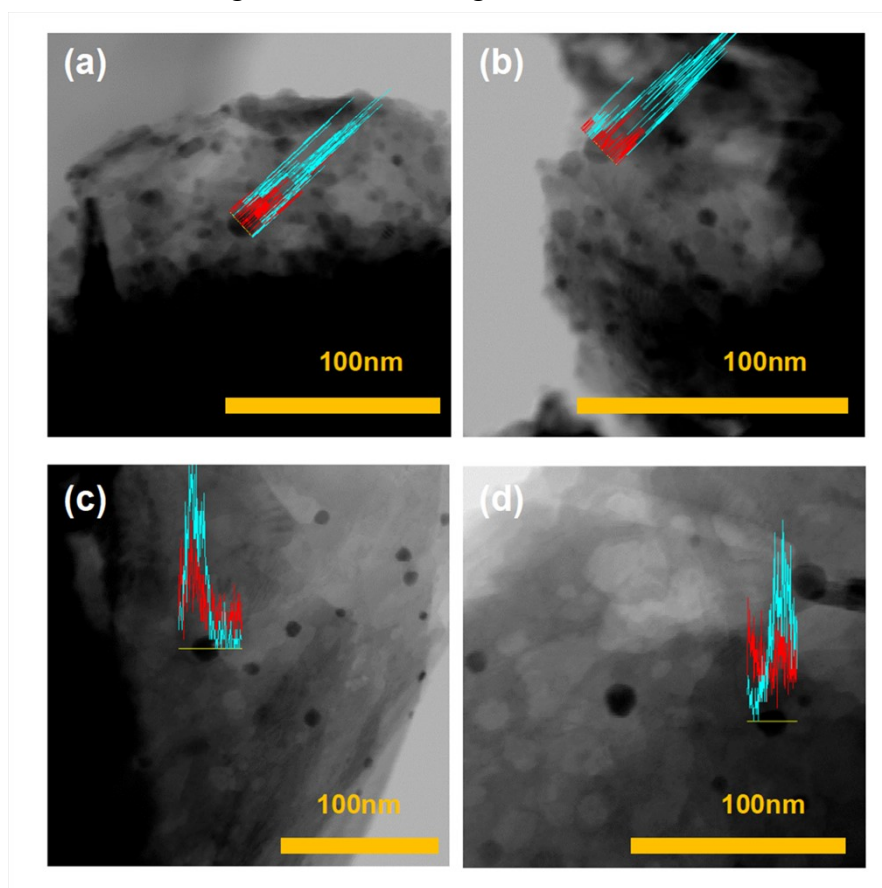

Fig. S2. (a) and (b) Rh (blue lines) and Cr (red lines) EDS line scanning of the  $\text{ZnIn}_2\text{S}_4\text{-Rh-Cr}$ ; (c) and (d) Pt (blue lines) and Cr (red lines) EDS line scanning of the  $\text{ZnIn}_2\text{S}_4\text{-Pt-Cr}$ ;

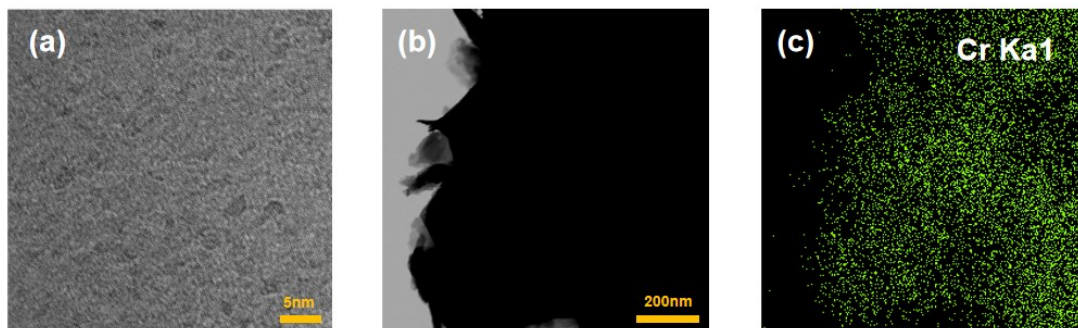

Figure S3. (a) HRTEM images, (b) TEM images and (c) corresponding Cr elemental mapping of the  $\text{ZnIn}_2\text{S}_4\text{-Cr}$ .

## References

1. H. Jing, G. Xu, B. Yao, J. Ren, Y. Wang, Z. Fang, Q. Liang, R. Wu and S. Wei, *ACS Appl. Energ. Mater.*, 2022, 5, 10187-10195.
2. S. Wei, Y. Chen, P. Wu, X. Liu, J. Ren, B. Yao, H. Xu, W. Dou, Y. Wang, R. Wu, Z. Fang and Q. Liang, *Appl. Cataly. A-Gen.*, 2022, 640.
